# Supplementary material for: Boosting the energy storage performance of V2O5 nanosheets by intercalating conductive graphene quantum dots
Source: Royal Society of Chemistry journal article supplement (doi:10.1039/d0nr04362a), 2020-01-01
Supplement: d0nr04362a1.pdf [file d0nr04362a1.pdf]

## Appendix A. Electronic Supplementary Information

Boosting the Energy Storage Performance of  $V_2O_5$

Nanosheet by Intercalating Conductive Graphene

Quantum Dots

Akhilesh Babu Ganganboina<sup>1</sup>, Enoch Y. Park<sup>1, 2</sup> and Ruey-An Doong<sup>3, 4\*</sup>

1. Graduate Institute of Green Science and Technology, University of Shizuoka, Shizuoka, Japan.
2. Department of Bioscience, Graduate School of Science and Technology, Shizuoka University, 836 Ohya Suruga-ku, Shizuoka 422-8529, Japan
3. Institute of Analytical and Environmental Sciences, National Tsing Hua University, Hsinchu, 30013, Taiwan.
4. Faculty of Science and Technology, Airlangga University, Sarabaya, 60115, Indonesia.

\*Corresponding author: Ruey-An Doong (radoong@mx.nthu.edu.tw)

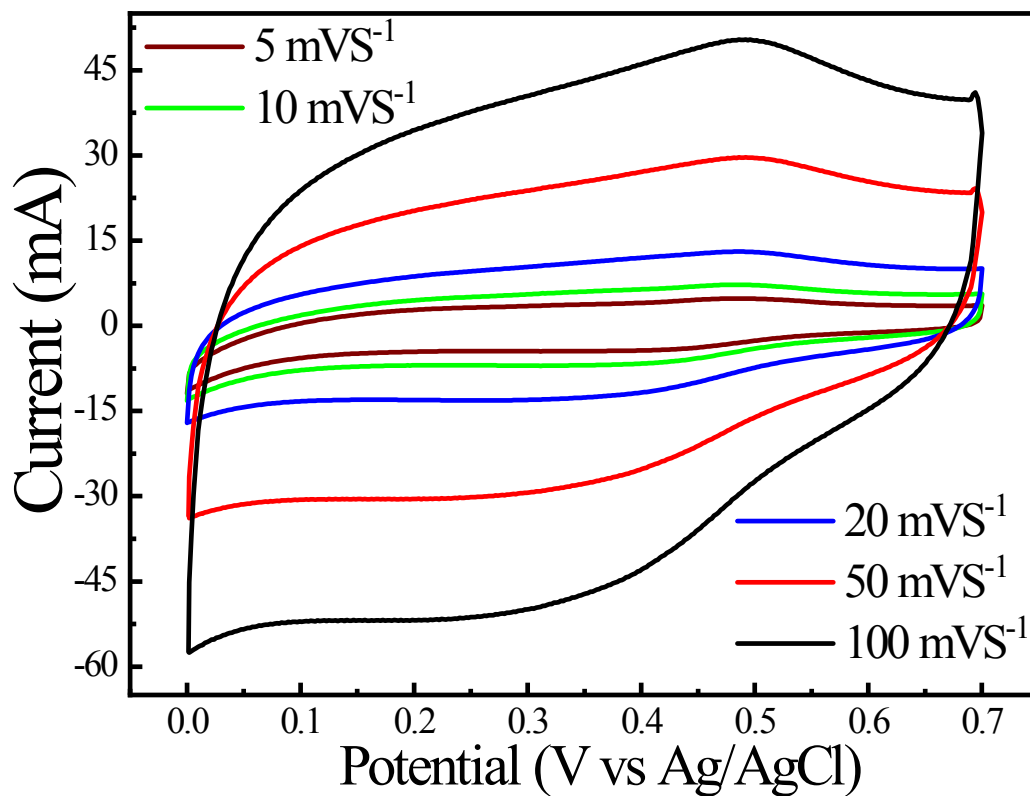

**Fig. S1.** The CV curves of VNS-GQD-10 at different scan rates from 5 to 100 mV s<sup>-1</sup>.

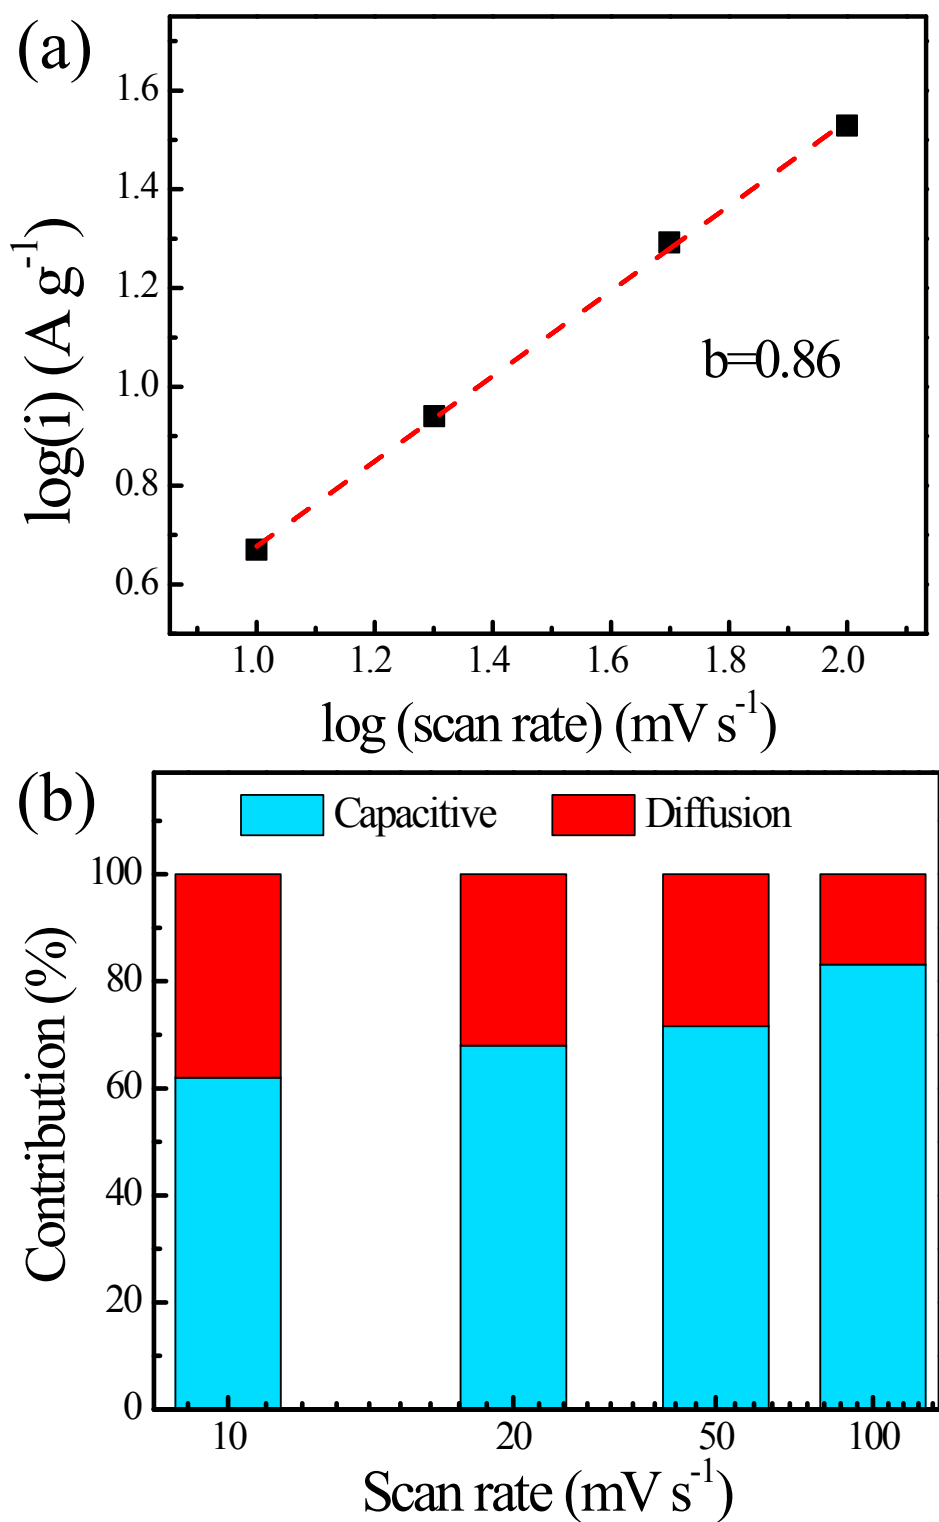

**Fig. S2.** The (a) b-value of anodic scans and (b) contribution percentage of capacitive- and diffusion-controlled processes as a function of scan rate.

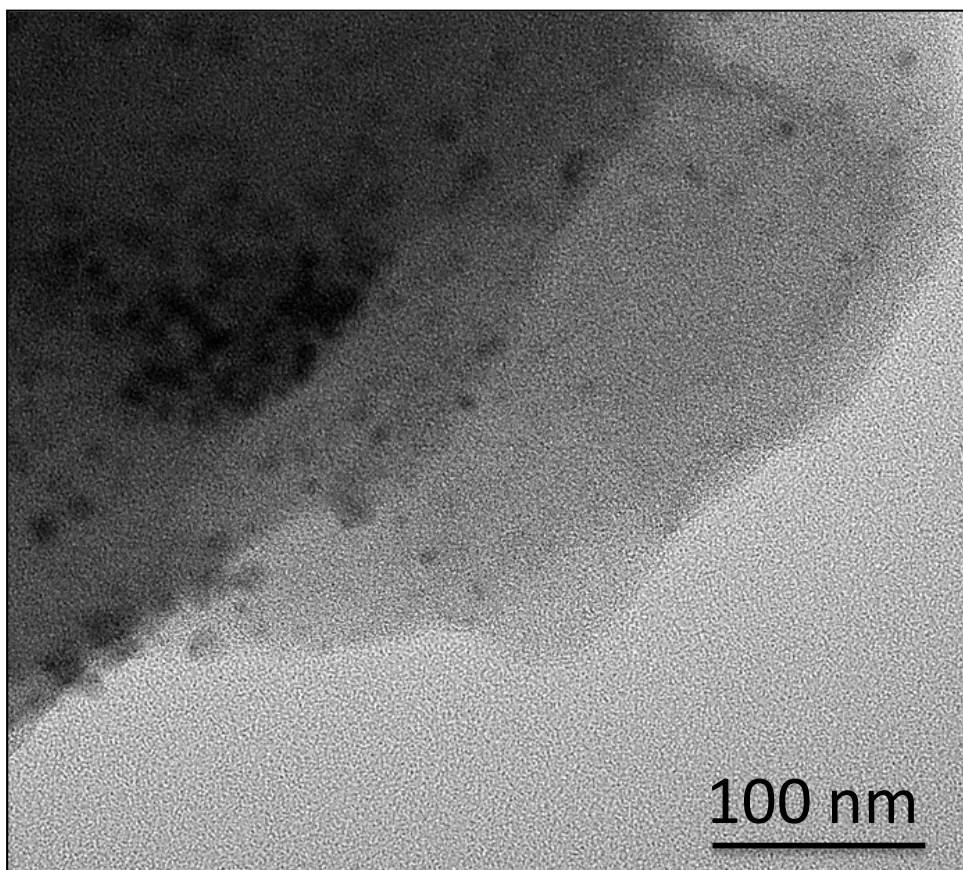

Fig S3. TEM image of the VNS-GQD after 5000 cycles of charging-discharging processes.
